# Supplementary material for: Effects of food-derived oligopeptide iron chelates on liver injury and gut microbiota homeostasis in iron-deficiency anemia female rats: a pilot study
Source: Royal Society of Chemistry journal article supplement (doi:10.1039/d3fo00914a), 2023-01-01
Supplement: d3fo00914a1.pdf [file d3fo00914a1.pdf]

*Supplementary Material*

**Supplementary Table 1** Composition of two food-derived oligopeptide iron chelates

| Group   | Iron content (mg/kg) | Moisture content (%) | Ash content (%) | Protein content (%) | Peptide content (%) | <1000u Proportion of protein hydrolyzate (%) |
|---------|----------------------|----------------------|-----------------|---------------------|---------------------|----------------------------------------------|
| MCOP-Fe | 1750.0               | 4.7                  | 1.4             | 106.3               | 91.0                | 98.4                                         |
| WPP-Fe  | 1010.0               | 3.7                  | 2.5             | 62.7                | 73.8                | 71.3                                         |

MCOP-Fe, marine fish oligopeptide iron chelate; WPP-Fe, whey protein oligopeptide iron chelate.
